# Supplementary material
Source: publisher figshare collection journal article supplement (https://acs.figshare.com/ndownloader/files/5692782)
Supplement: Supplementary file 1 [file 5692782]

**Bi-1,10-phenanthrolines and Their Mono-nuclear Ru(II) Complexes**

APR 04 2002

Yi-Zhen Hu, Qin Xiang, Randolph P. Thummel\*

INORG CHEM

*Department of Chemistry, University of Houston, Houston, TX 77204-5003*

**Supporting Information** (7 pages)

**Figure Captions**

**Figure S1.** (A) Dependence of the relative luminescence quantum yield ( $\phi/\phi_0$ ) of **Ru-3** ( $[\text{Ru-3}] = 1 \times 10^{-5} \text{ M}$ , MeOH) on the concentration of  $\text{Zn}^{2+}$ ; (B) Titration profile for **Ru-3** showing the relative quantum yield as a function of  $-\log[\text{Zn}^{2+}]$ . The solid line represents a non-linear fit according to equation (1).

**Figure S2.** Titration profile for **Ru-3** with  $\text{Cd}^{2+}$  showing the relative luminescence quantum yield as a function of  $-\log[\text{Cd}^{2+}]$ . The solid line represents a non-linear fit according to equation (1). The concentration of **Ru-3** was  $1 \times 10^{-5} \text{ M}$ , MeOH.

**Figure S3.** Titration profile for **Ru-3** with  $\text{Hg}^{2+}$  showing the relative luminescence quantum yield as a function of  $-\log[\text{Hg}^{2+}]$ . The solid line represents a non-linear fit according to equation (1). The concentration of **Ru-3** was  $1 \times 10^{-5} \text{ M}$ , MeOH.

**Figure S4.** Titration profile for **Ru-1** with  $\text{Zn}^{2+}$  showing the relative luminescence quantum yield as a function of  $-\log[\text{Zn}^{2+}]$ . The solid line represents a non-linear fit according to equation (1). The concentration of **Ru-1** was  $1 \times 10^{-5} \text{ M}$ , MeOH.

**Figure S5.** Titration profile for **Ru-2** with  $\text{Zn}^{2+}$  showing the relative luminescence quantum yield as a function of  $-\log[\text{Zn}^{2+}]$ . The solid line represents a non-linear fit according to equation (1). The concentration of **Ru-2** was  $1 \times 10^{-5} \text{ M}$ , MeOH.

**Figure S6.** Titration profile for **Ru-4** with  $\text{Zn}^{2+}$  showing the relative luminescence quantum yield as a function of  $-\log[\text{Zn}^{2+}]$ . The solid line represents a non-linear fit according to equation (1). The concentration of **Ru-4** was  $1 \times 10^{-5} \text{ M}$ , MeOH.

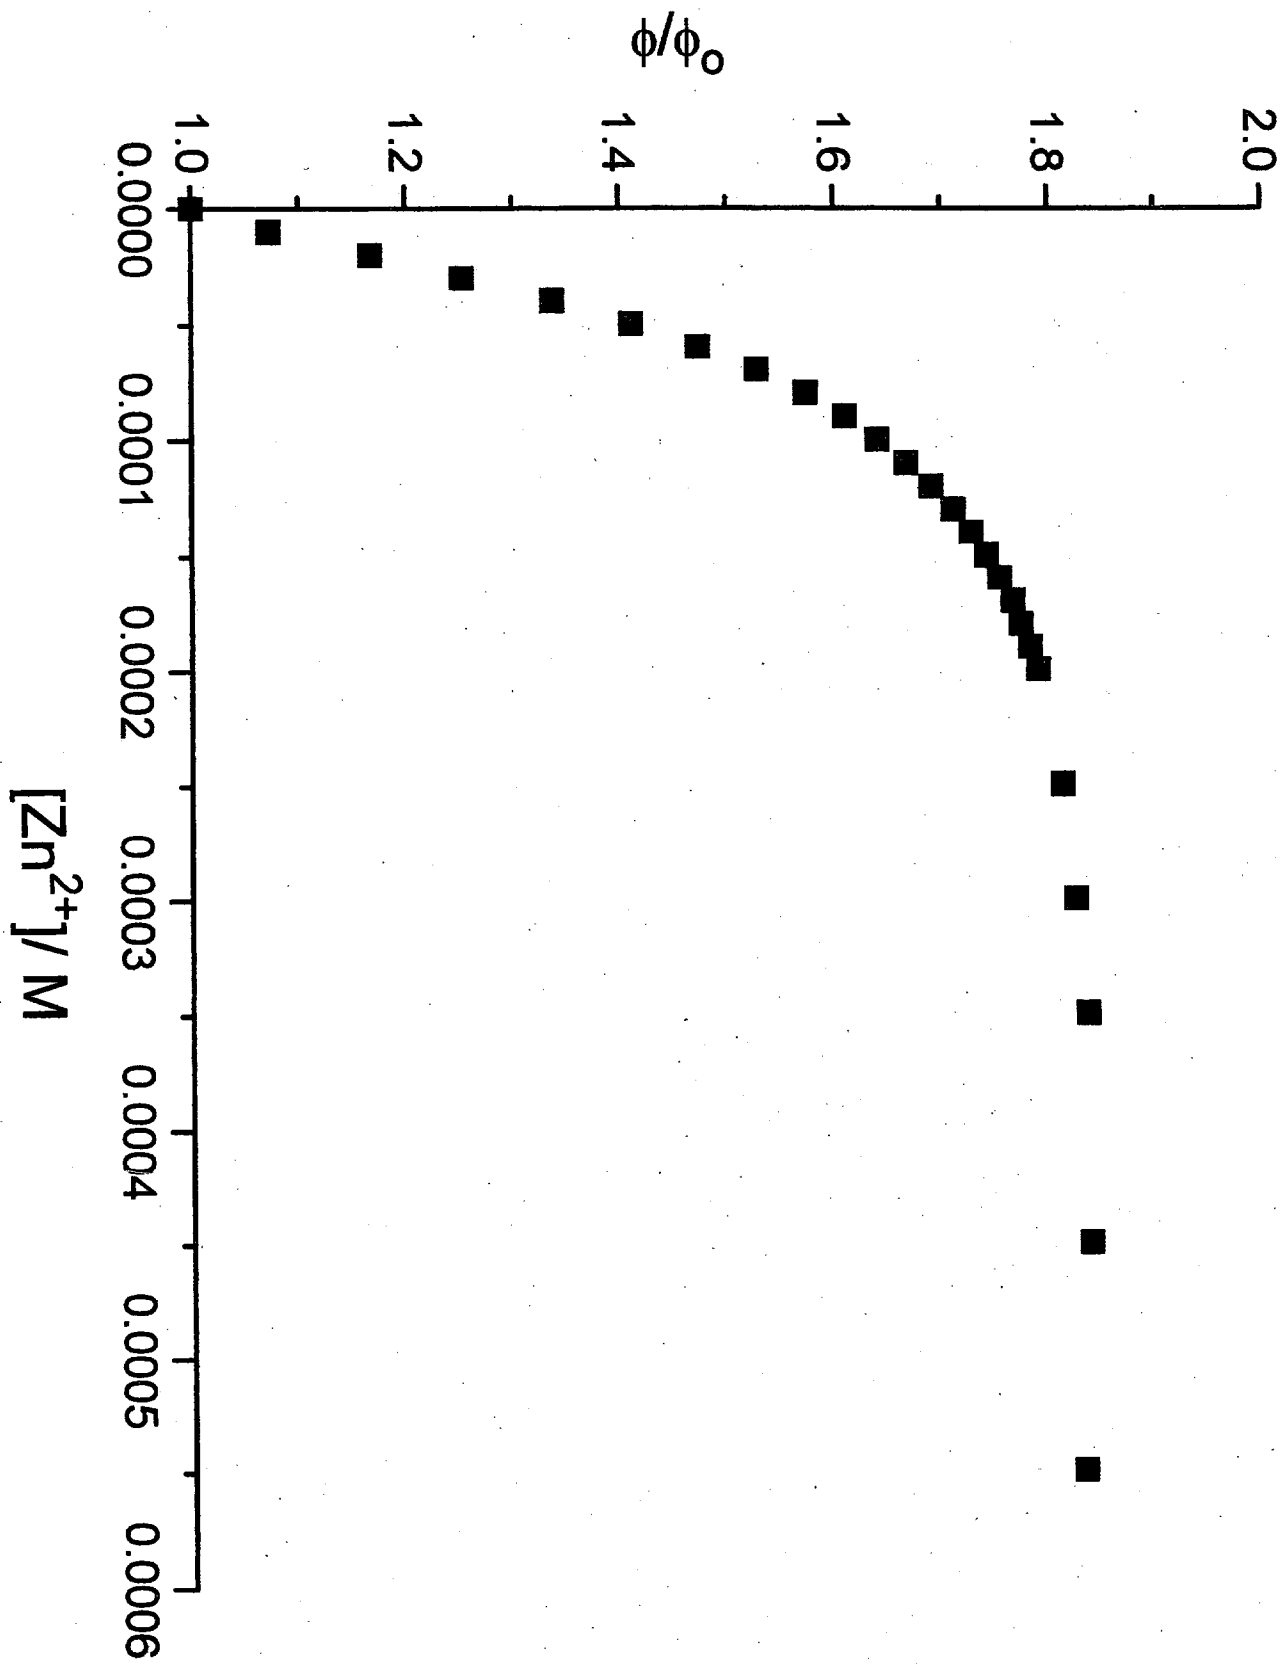

Figure S1A

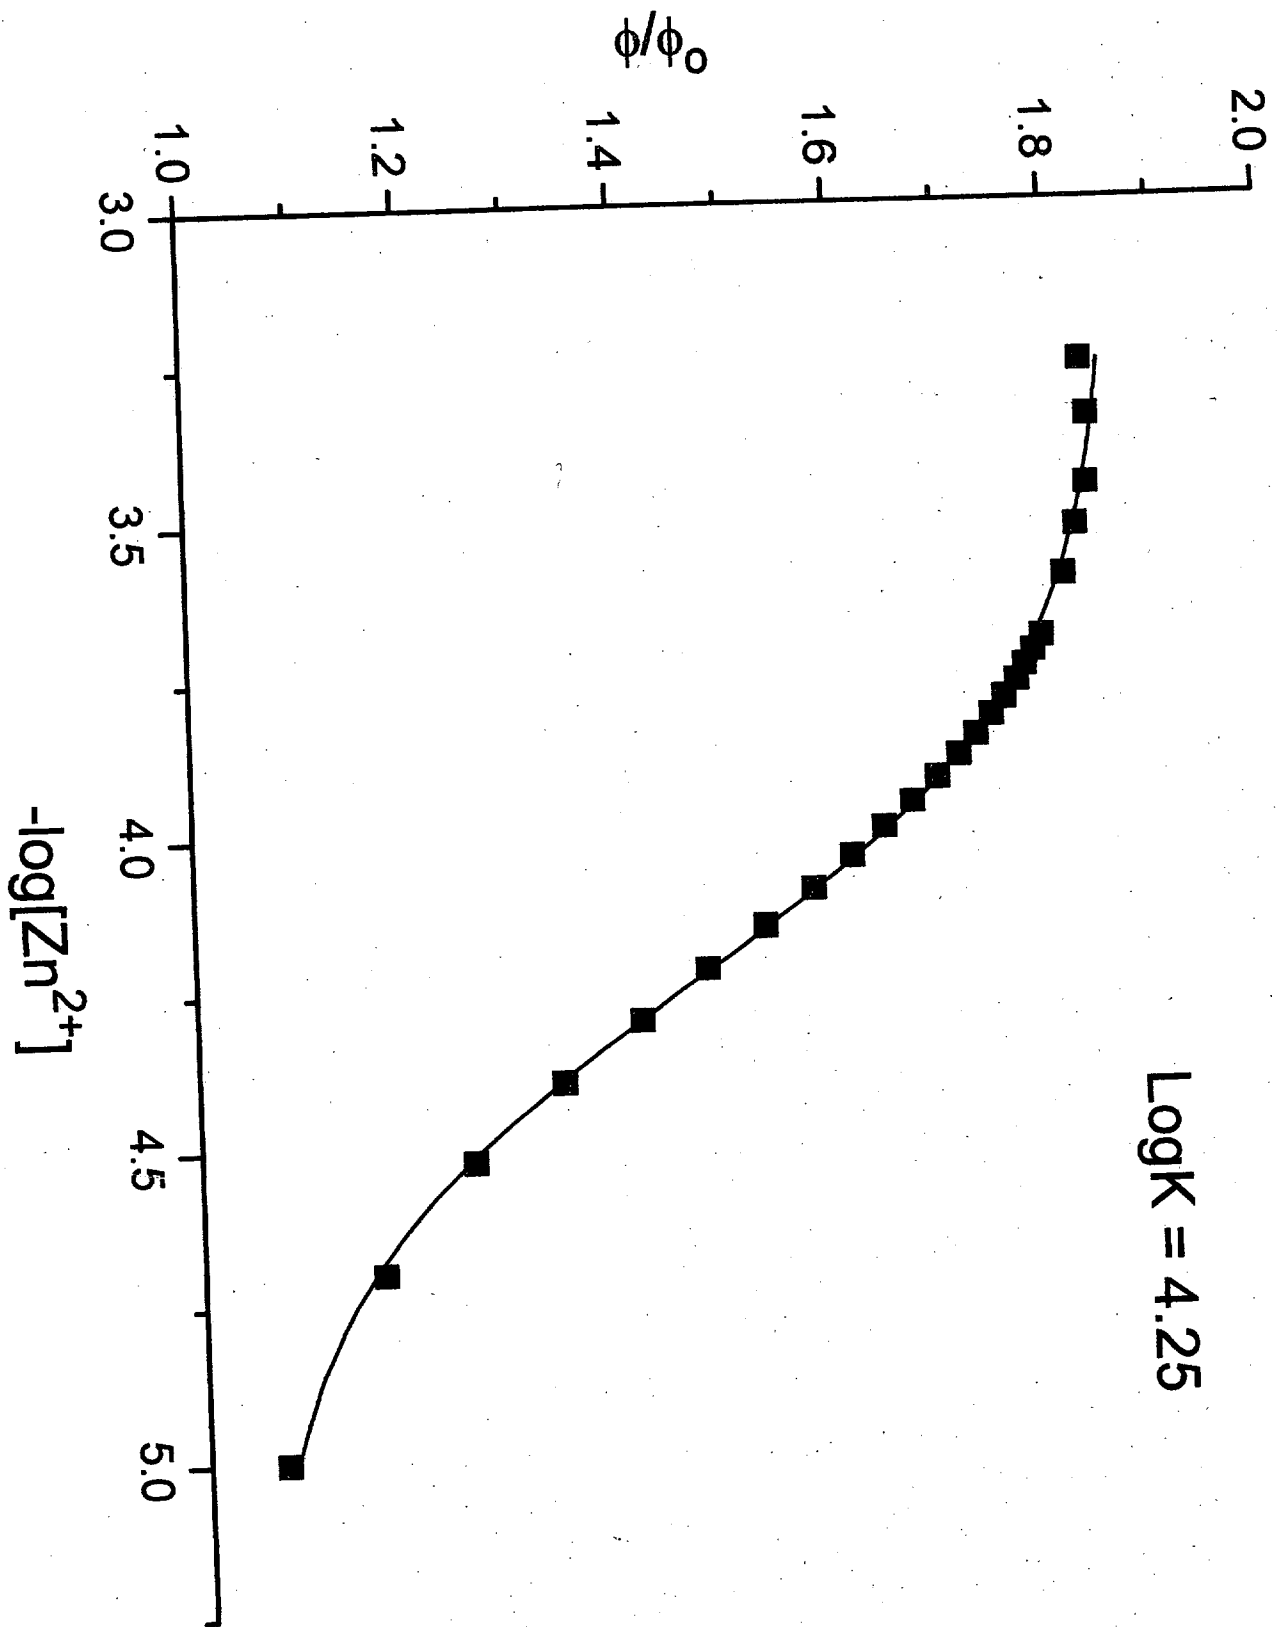

Figure S1B

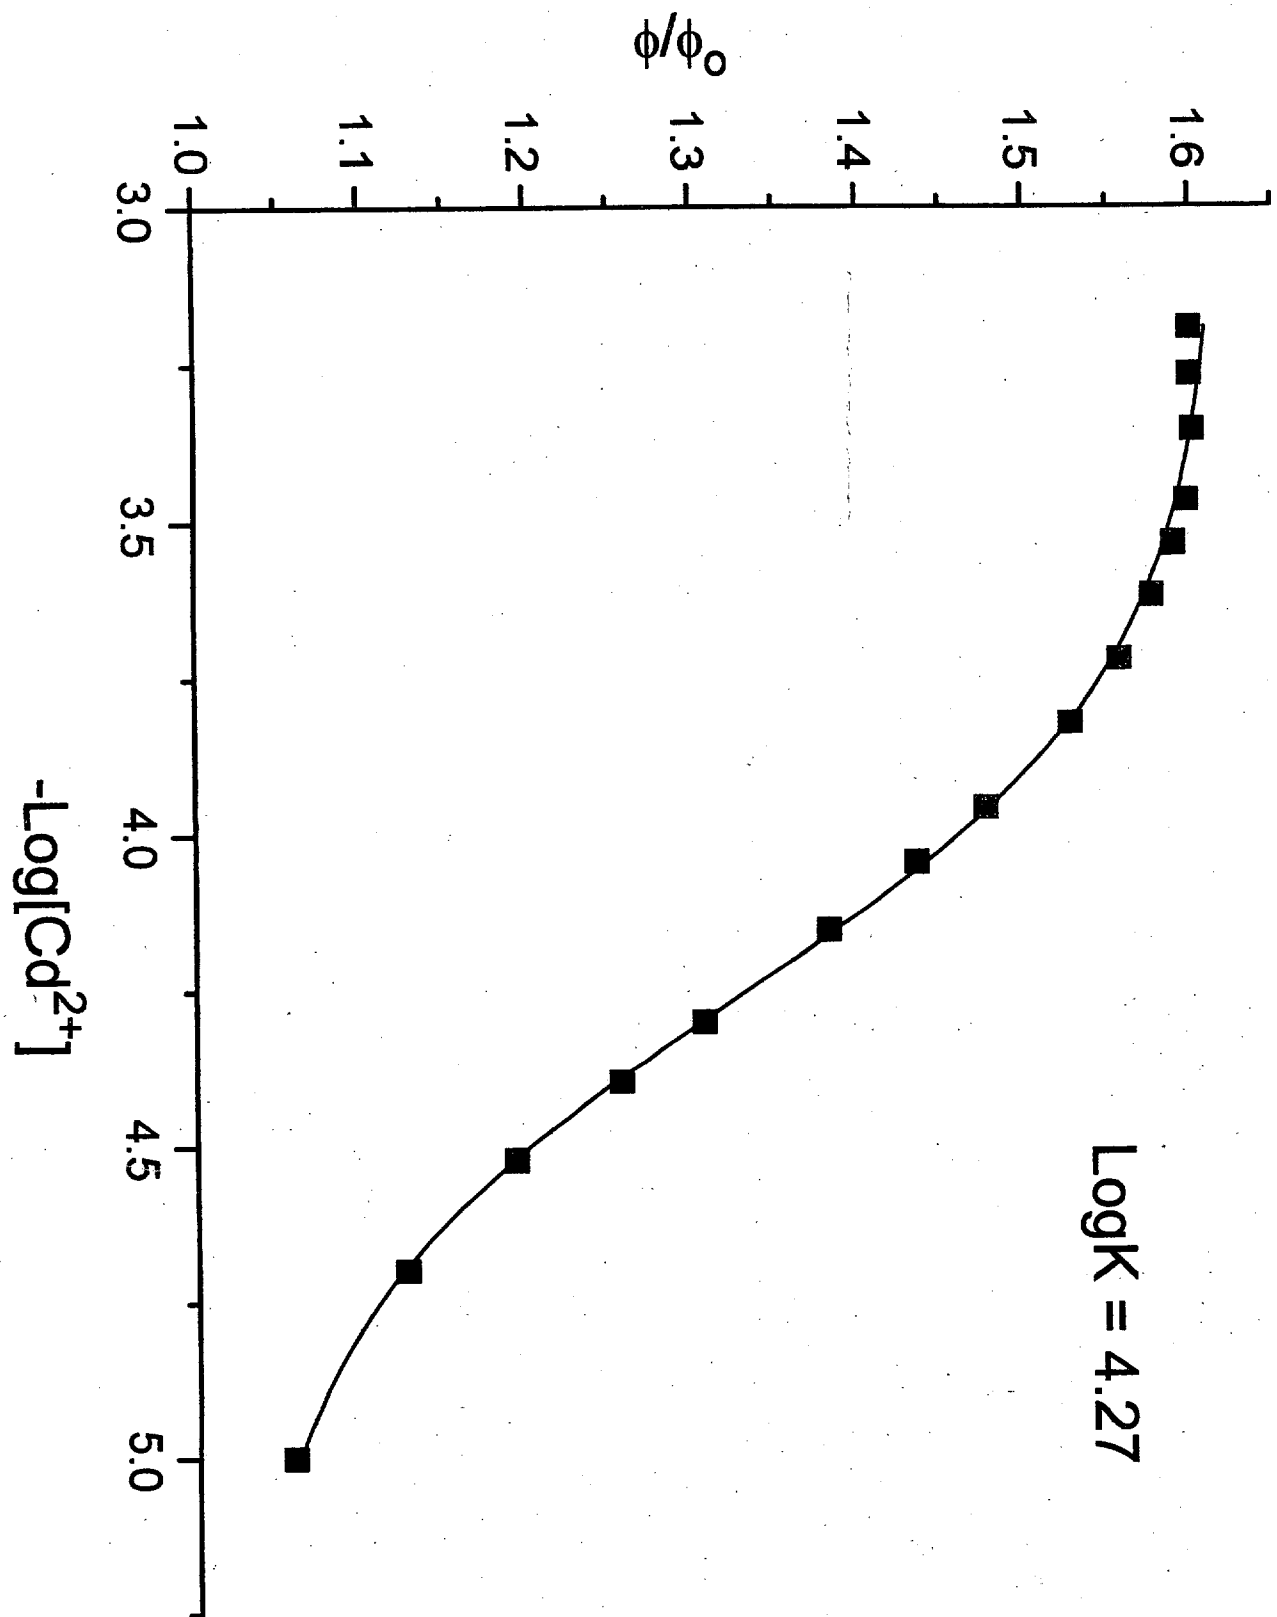

Figure S2

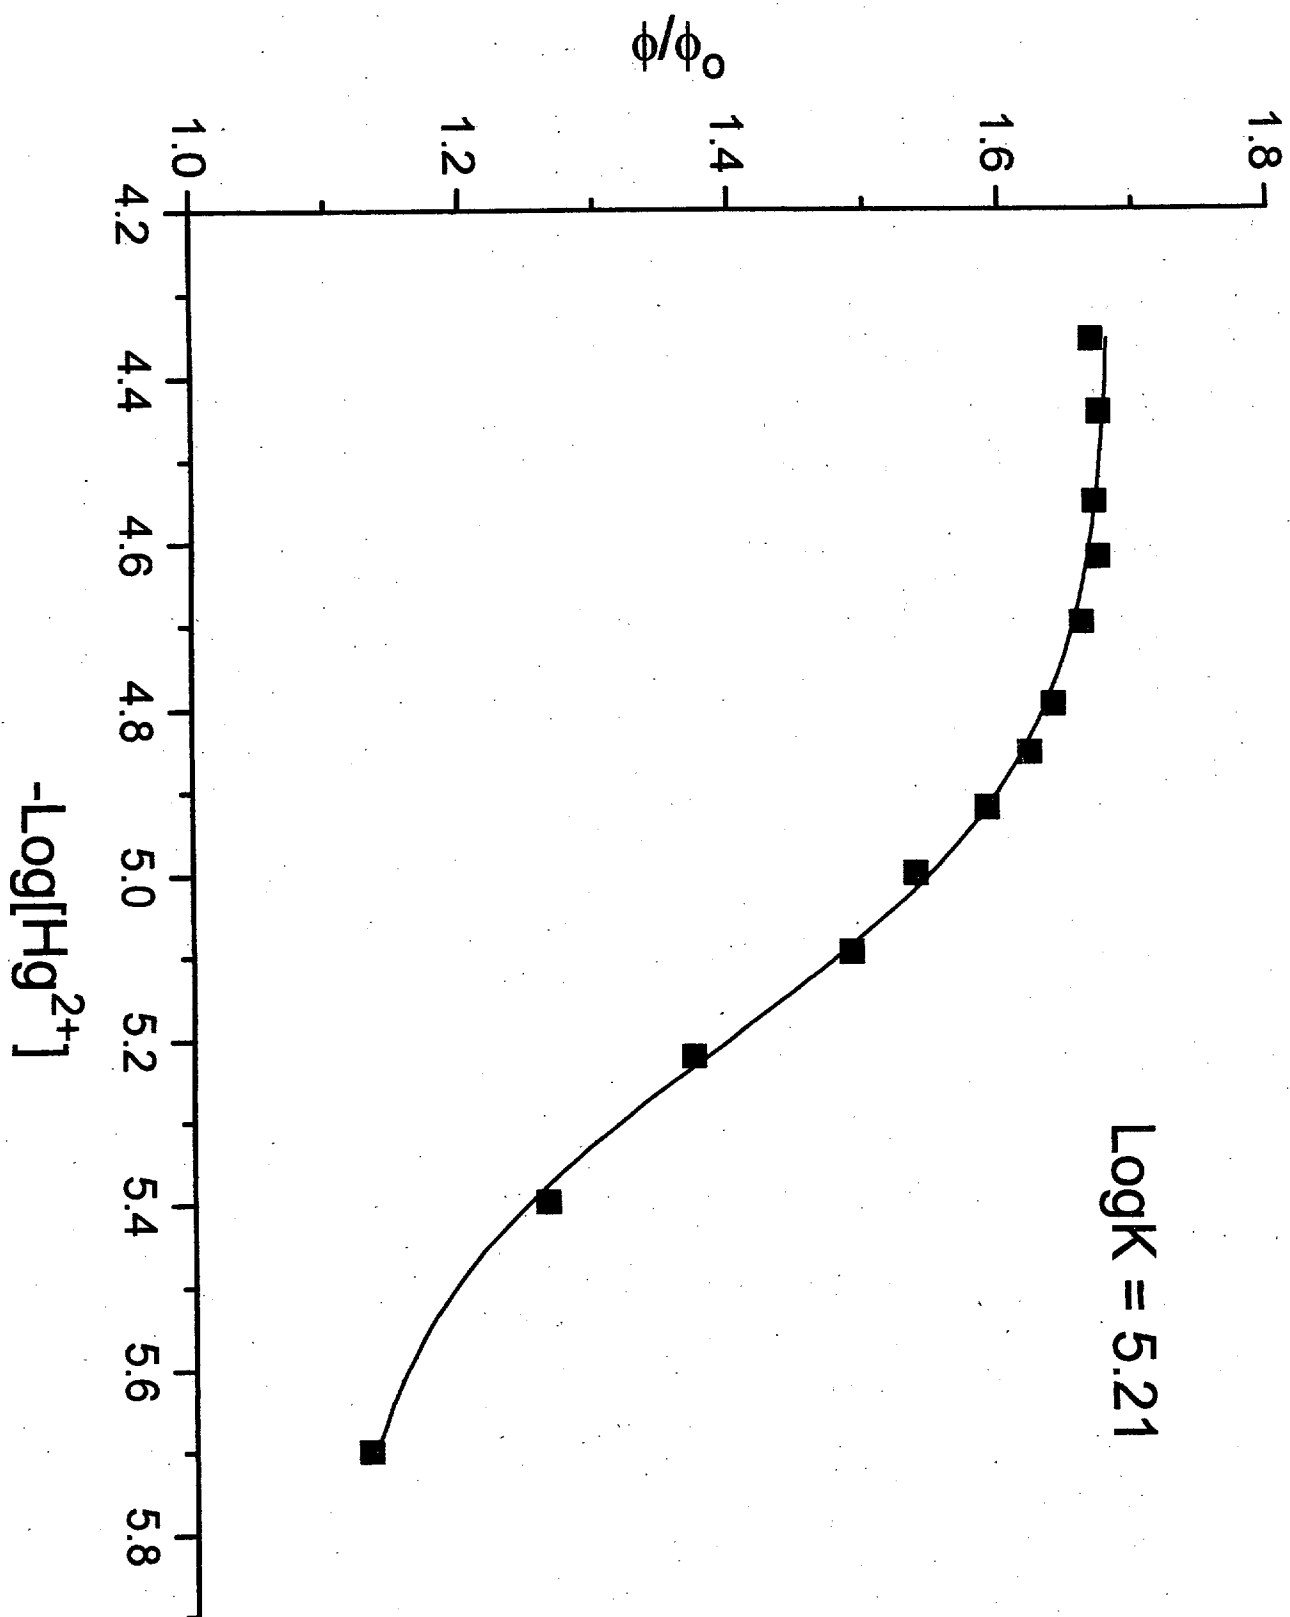

Figure S3

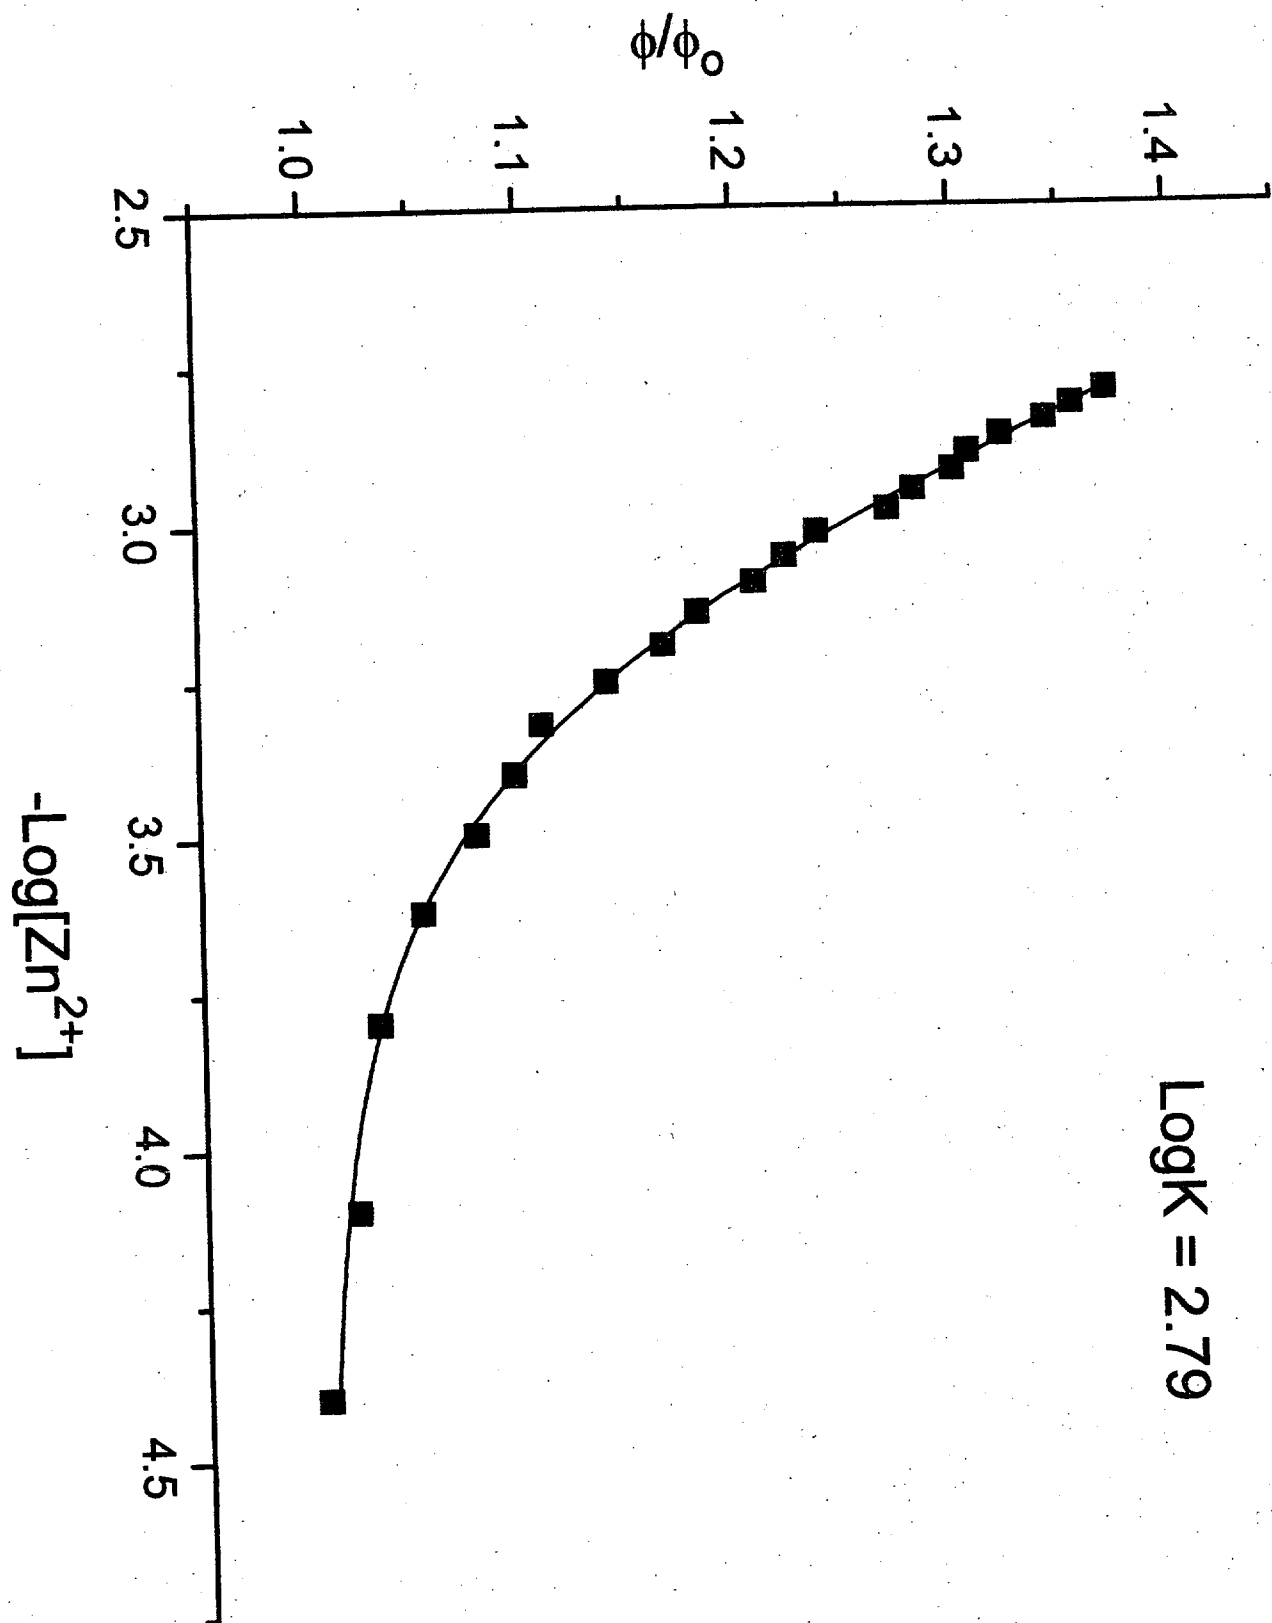

Figure S4

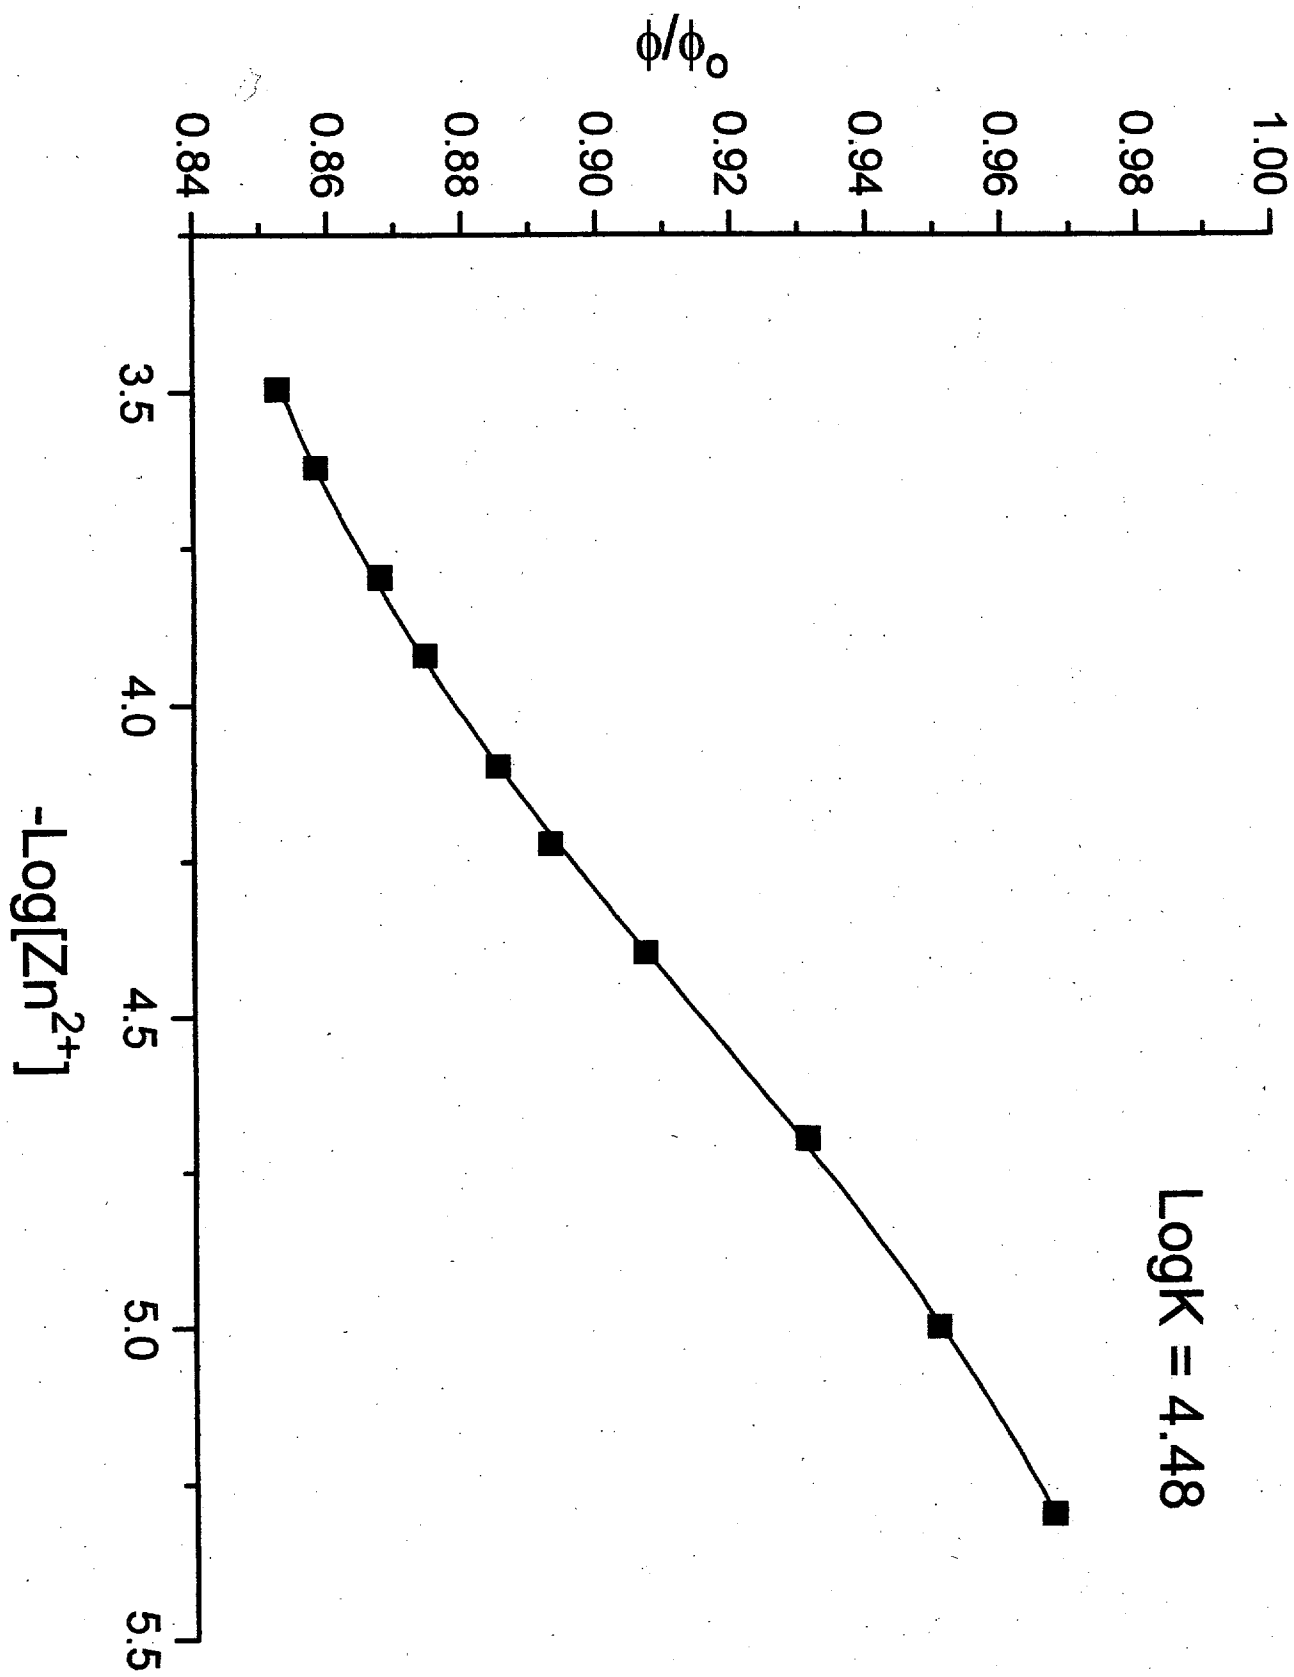

Figure S5

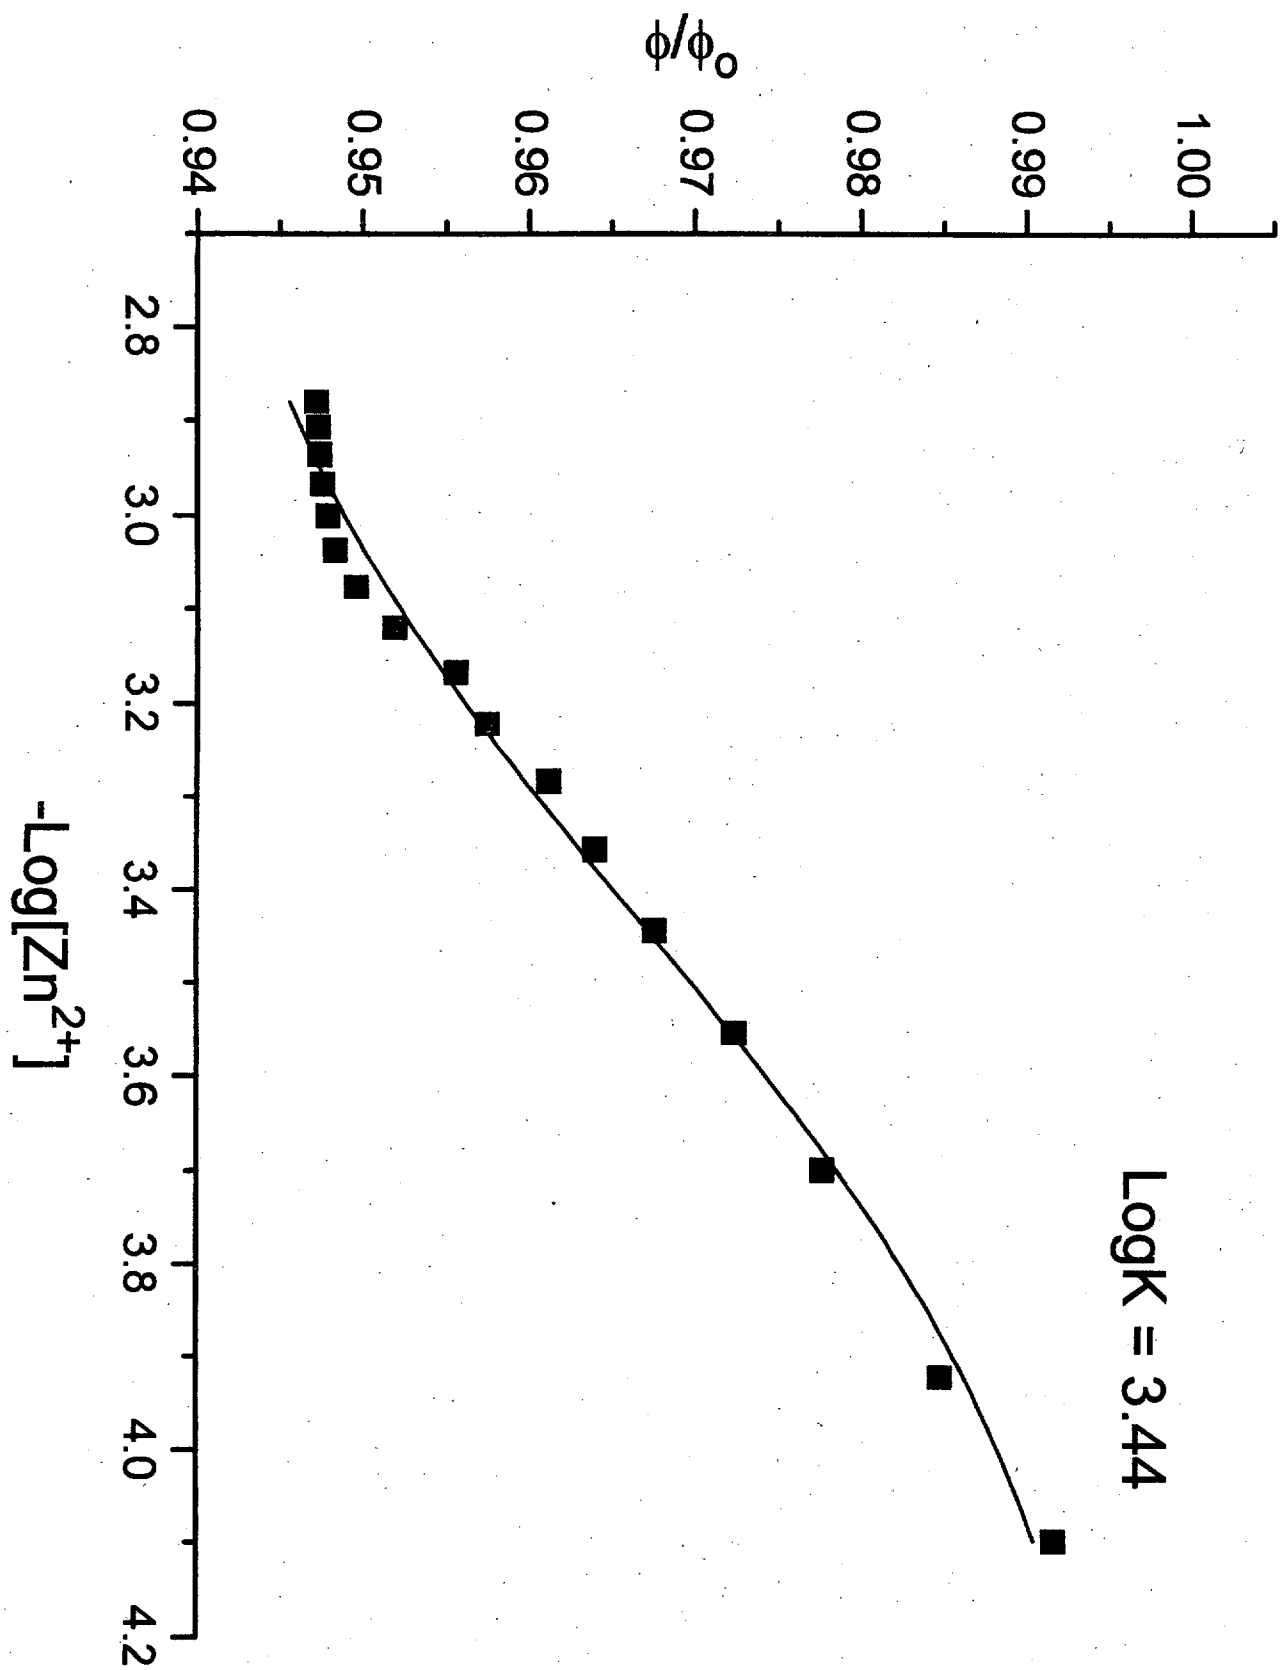

Figure S6
